# Supplementary material for: The clinical diagnosis of Achilles tendinopathy: a scoping review
Source: PeerJ. 2021 Sep 28;9:e12166. doi: 10.7717/peerj.12166 (PMC8485842; doi:10.7717/peerj.12166)
Supplement: Supplemental Information 1 — All collected data from all included studies used in the scoping review. [file peerj-09-12166-s001.xlsx]

## Sheet: Sheet1
AUTHOR	YEAR	STUDY DESIGN	SAMPLE SIZE	TENDINOPATHY LOCATION	TERMINOLOGY	SUBJECTIVE HISTORY	CLINICAL TESTS	OUTCOME MEASURES
Abate	2019	Case-control	64 (M/F = 40/24)	Midportion	Tendinopathy	Location of pain Impaired function	Pain on palpation	VISA-A
Aiyegbusi	2020	Cross-sectional Cohort	85 (M/F = 56/29)	Not specified	Tendinopathy	VISA-A	Royal London Hospital Test	VISA-A
Aldridge	2004	Review	N/A	Insertional	Tendonitis	Pain with tendon loading	Pain on palpation Pain with passive dorsiflexion	N/A
Alfredson	2003	Review	N/A	Midportion	Tendinopathy	Location of pain (2-6cm above calcaneal insertion) Pain with tendon loading Morning stiffness	Pain on palpation Localised swelling	VAS
Alfredson	2007	Review	N/A	Midportion	Tendinopathy	Pain with tendon loading Morning stiffness	Localised swelling Single-leg Heel Raise Hopping on the spot Forward hopping	N/A
Alfredson	2018	Retrospective cohort	771 (M/F = 481/290)	Insertional Midportion	Tendinopathy	Pain with tendon loading VISA-A	Not specified	VAS VISA-A
Aronow	2005	Review	N/A	Insertional Midportion	Tendinopathy	Pain with tendon loading	Pain on palpation Localised swelling Pain with passive dorsiflexion (insertional) Painful Arc Sign (midportion) Single-leg Heel Raise	N/A
Asplund	2013	Review	N/A	Insertional Midportion	Tendinopathy	Location of pain (2-6cm above calcaneal insertion - midportion) Location of pain (insertion) Pain with tendon loading Morning stiffness	Pain on palpation Localised swelling	VISA-A
Azevedo	2009	Case-control	42 (M/F = 32/10)	Midportion	Tendinopathy	Gradual onset of pain Morning stiffness History of swelling Pain with loading	Pain on palpation Localised tendon thinckening Painful Arc Sign	EMG
Bains	2006	Review	N/A	Midportion	Tendinopathy	Gradual onset of pain Morning stiffness Pain with loading Change in training VISA-A	Pain on palpation (2-5cm above calcaneal insertion) Localised swelling Localised tendon thickening Hopping on the spot Forward hopping 6m hop test	VISA-A
Barge-Caballero	2008	Retrospective cohort	242 (M/F = 191/51)	Not specified	Tendinopathy	Pain with tendon loading	Pain on palpation	N/A
Barker-Davies	2017	Protocol	N/A	Insertional Midportion	Tendinopathy	Location of pain (2-6cm above calcaneal insertion - midportion) Location of pain (insertion) Pain with tendon loading Morning stiffness Change in training	Pain on palpation (2-6cm above calcaneal insertion) or at insertion Single leg calf raise Hopping on the spot Hopping multidirectional Forward hopping	VAS VISA-A Functional Activity Assesment (FAA)
Baskerville	2018	Review	N/A	Not specified	Tendinopathy	Gradual onset of pain Pain with loading Stiffness	Pain on palpation Pain with passive and active movement Reduced strength	N/A
Benazzo	1997	Review	N/A	Insertional	Tendinopathy	Pain with tendon loading Morning stiffness	Pain on palpation	N/A
Benito	2016	Case report	5 (M/F = 2/3)	Insertional	Tendinopathy	Location of pain (insertion) Gradual onset of symptoms Pain with tendon loading	Not specified	VISA-A EVA
Bhatty	2019	Review	N/A	Insertional Midportion	Tendinopathy	Pain with tendon loading	Pain on palpation Localised swelling Pain with passive dorsiflexion (insertional) Pain with resisted plantarflexion Reduced dorsiflexion	N/A
Bjordal	2006	RCT	7 (M/F = not specified)	Not specified	Tendinopathy	Pain with tendon loading Location of pain	Pain on palpation Forward hop	N/A
Boesen	2017	RCT	60 (M/F = 60/0)	Midportion	Tendinopathy	Location of pain (2-7cm above calcaneal insertion) Duration of symptoms (> 3 months)	Pain on palpation Tendon thickening Single-leg heel raise	VAS VISA-A
Borda	2017	Case Report	1 (M/F = 0/1)	Midportion	Tendinopathy	Gradual onset of pain Pain with loading	Pain on palpation MMT Single leg heel raise	LEFS NRS
Brown	2006	RCT	26 (M/F = 17/9)	Midportion	Tendinopathy	Location of pain Gradual onset of pain Duration of symptoms (> 6 weeks) Pain with loading	Pain on palpation Single-leg heel raise Hopping	VISA-A NRS Patient rating scale
Carcia	2010	Clinical Guidelines	N/A	Midportion	Tendinopathy	Location of pain (2-6cm above calcaneal insertion) Pain with tendon loading Morning stiffness	Pain on palpation (2-6cm above calcaneal insertion) Painful Arc Sign Royal London Hospital Test Single-leg Heel Raise Hopping	VISA-A Foot and Ankle Ability Measure (FAAM)
Cassel	2018	Case-control	182 (M/F = 113/69)	Not specified	Tendinopathy	Pain with tendon loading	Pain on palpation	N/A
Chazan	1998	Review	N/A	Insertional Midportion	Tendonitis Tendonosis	Gradual onset of pain Morning stiffness Pain with loading	Pain on palpation Localised swelling Localised tendon thickening Pain with passive dorsiflexion Pain with resisted plantarflexion Reduced dorsiflexion	N/A
Cheng	2016	Prospective cohort	42 (M/F = 29/13)	Insertional	Tendinopathy	Location of pain (distal 2cm) Localised swelling Pain with tendon loading Duration of symptoms (> 6 months)	Not specified	VISA-A
Chester	2008	Prospective cohort	16 (M/F = 11/5)	Midportion	Tendinopathy	Location of pain (2-6cm above calcaneal insertion) Duration of symptoms (> 3 months)	Pain on palpation Localised swelling	VAS Functional Index of the Leg and Lower Limb (FILLA) EuroQol
Chimenti	2016	Case-control	40 (M/F = 20/20)	Insertional	Tendinopathy	Location of pain (insertion) Pain with tendon loading	Pain on palpation	Foot and Ankle Ability Measure (FAAM) VISA-A NRS
Chimenti	2017	Review	N/A	Insertional	Tendinopathy	Location of pain (distal 2cm) Pain with tendon loading Stiffness	Pain on palpation Localised swelling Pain with passive dorsiflexion Pain with resisted plantarflexion Reduced dorsiflexion	N/A
Chimenti	2020	Case-control	46 (M/F = 30/16)	Insertional Midportion	Tendinopathy	Location of pain (2-6cm above calcaneal insertion - midportion) Location of pain (distal 2cm) Duration of pain (> 12 weeks) Pain with tendon loading Tendon stiffness	Pain on palpation (2-6cm above calcaneal insertion) or at insertion	Patient-Reported Outcomes Measurement Information System (PROMIS) short form 8b Brief Pain Inventory (BPI) VISA-A International Physical Activity Questionnairre (IPAQ) NRS Tampa Scale of Kinesiophobia (TSK) Pain Catastrophising Scale (PCS)
Cook	2002	Review	N/A	Insertional Midportion	Tendinopathy	Gradual onset of pain Location of pain Pain with tendon loading Tendon stiffness Change in activity VISA-A	Pain on palpation Localised swelling Localised tendon thickening Single-leg heel raise Hopping	VISA-A
Coombes	2018	Case-control	67 (M/F = 37/30)	Insertional Midportion	Tendinopathy	Location of pain Duration of pain (>12wks)	Pain on palpation Single-leg heel raise	VISA-A NRS Active Australia Questionnaire
Courville	2009	Review	N/A	Midportion	Tendinopathy	Pain with tendon loading Location of pain Morning stiffness Change in activity	Pain on palpation Localised swelling Localised tendon thickening	N/A
Creaby	2017	Case-control	25 (M/F = 25/0)	Midportion	Tendinopathy	Location of pain Pain with tednon loading Morning stiffness	Pain on palpation Hopping	VISA-A
Crill	2014	Prospective cohort	25	Midportion	Tendinopathy	Location of pain (2-4cm above calcaneal insertion)	Pain on palpation Tendon thickening (2-4cm above calcaneal insertion) Single-leg heel raise	Focus on Therapeutic Outcomes (FOTO)
de Jong	2011	Cross-sectional Cohort	107 (M/F = 51/56)	Midportion	Tendinopathy	Location of pain (above calcaneal insertion)	Nil	N/A
De Marchi	2018	Cross-sectional Cohort	27 (M/F = 19/8)	Midportion	Tendinopathy	Location of pain (2-6cm above calcaneal insertion) Duration of symptoms (> 6 months) Pain with tendon loading	Not specified	Western Ontario and McMaster Universities Arthritis Index (WOMAC) EuroQuality of life 5-dimension-5-level questionnaire (EQ-5D-5L)
Den Hartog	2009	Review	N/A	Insertional	Tendonosis Tendinopathy	Gradual onset of pain Duration of symptoms Pain with loading	Pain on palpation Localised swelling Localised tendon thickening	N/A
Divani	2010	Cross-sectional Cohort	26 (M/F = 17/9)	Midportion	Tendinopathy	Not specified	Pain on palpation	VISA-A
Docking	2015	Cross-sectional Case-control	21 (M/F = 20/1)	Insertional Midportion	Tendinopathy	Pain with tendon loading Duration of symptoms	Single-leg heel raise Hopping	N/A
Duthon	2011	Prospective cohort	14 (M/F = 11/3)	Midportion	Tendinopathy	Location of pain Duration of pain (> 1 year)	Localised thickening Dorsiflexion ROM Plantarflexion strength Silfverskiold test	American Orthopaedic Foot and Ankle Society (AOFAS) Hind-foot Scale Foot Function Index (FFI) SF-12
Ebbesen	2018	RCT	44 (M/F = 25/19)	Not specified	Tendinopathy	Location of pain Duration of pain (> 3 months)	Not specified	VAS VISA-A Foot and Ankle Outcome Score (FAOS)
Eckenrode	2019	Case-control	41 (M/F = 19/22)	Insertional Midportion	Tendinopathy	Location of pain Duration of pain (> 3 months) Pain with tendon loading	Pain on palpation Single leg heel raise	Pain Catastrophizing Scale VISA-A LEFS
Feilmeier	2017	Review	N/A	Midportion	Tendinopathy	Location of pain (2-6cm above calcaneal insertion) Swelling Pain with tendon loading Morning stiffness Change in activity VISA-A	Pain on palpation (2-6cm above calcaneal insertion) Tendon thickening Pain with passive dorsiflexion Painful Arc Sign Royal London Hospital Test Single-leg Heel Raise Hopping	VISA-A
Finnamore	2019	Cross-sectional Cohort	25 (M/F = 12/13)	Midportion	Tendinopathy	Duration of symptoms (> 3months) Pain with tendon loading	Pain on palpation	VISA-A
Florit	2019	Retrospective cohort	110 (M/F = 103/7)	Not specified	Tendinopathy	Location of pain Pain with tendon loading	Pain on palpation Pain with tendon laoding tests (not specified)	N/A
Fredericson	1996	Review	N/A	Insertional Midportion	Tendonitis Tendonosis	Location of pain (2-6cm above calcaneal insertion - midportion) Location of pain (insertion) Pain with tendon loading Morning stiffness	Pain on palpation Localised swelling Localised tendon thickening	N/A
Furia	2007	Review	N/A	Insertional Midportion	Tendinopathy	Location of pain (2-5cm above calcaneal insertion - midportion) Location of pain (insertion) Pain with tendon loading	Pain on palpation Localised swelling Pain with passive dorsiflexion (insertional) Reduced dorsiflexion	N/A
Gardin	2016	Case-control	30 (M/F = 12/18)	Midportion	Tendonosis	Location of pain (2-7cm above calcaneal insertion) Duration of symptoms (> 6 months)	Pain on palpation	VISA-A
Gatz	2020	RCT	42 (M/F = 20/22)	Insertional Midportion	Tendinopathy	Pain with tendon loading Symptom duration (> 2 months) Morning stiffness	Pain on palpation	VISA-A
Habets	2017	Protocol	N/A	Midportion	Tendinopathy	Location of pain Duration of pain (> 3 months) Pain with tendon loading	Pain on palpation (2-7cm above calcaneal insertion) Localised swelling	VAS VISA-A Global Perceived Effect (GPE) SF-12 EQ-5D
Hasani	2020	Protocol	N/A	Midportion	Tendinopathy	Location of pain (2-6cm above calcaneal insertion) Pain with tendon loading Morning stiffness VISA-A	Nil	VISA-A NRS Patient Global Impression of Change (PGIC) Pain Acceptable Symptom State Instrument EQ 5D 5L Physical Activity Recall Questionnairre (PARQ) Work Productivity and Activity Impairment Questionnairre (WPAI) TSK PCS
Hernandez-Sanchez	2018	Case-control	210 (M/F = 148/62)	Insertional Midportion	Tendinopathy	Location of pain Pain with tendon loading Morning stiffness	Not specified	VISA-A
Holmes	2006	Case-control	82 (M/F = 44/38)	Not specified	Tendinopathy	Location of pain Pain with tendon loading	Pain on palpation	N/A
Horn	2015	Review	N/A	Insertional Midportion	Tendinopathy	Location of pain (2-6cm above calcaneal insertion - midportion) Location of pain (insertion) Pain with tendon loading	Localised swelling Painful Arc Sign Royal London Hospital Test	N/A
Hu	2008	Review	N/A	Insertional	Tendinopathy	Location of pain Pain with tendon loading Morning stiffness	Pain on palpation Localised tendon thickening Pain with passive dorsiflexion Reduced dorsiflexion Silfverskiold test	American Orthopaedic Foot and Ankle Society Ankle-Hindfoot Scale
Hutchison	2011	Systematic Review	578 (M/F = not specified)	Midportion	Tendinopathy	Location of pain (2-6cm above calcaneal insertion) Pain with tendon loading Morning stiffness	Pain on palpation Localised swelling Localised tendon thickening Painful Arc Sign Royal London Hospital Test Reduced dorsiflexion Jump test Single heel raise	VAS Foot and Ankle Score American Orthopaedic Foot and Ankle Society Score SF-36 VISA-A
Hutchison	2013	Case-control	21 (M/F = 9/12)	Midportion	Tendinopathy	Location of pain (2-6cm above calcaneal insertion) Morning stiffness	Pain on palpation Localised tendon thickening Painful Arc Sign Royal London Hospital Test Pain with dorsiflexion Single-leg heel raise Hopping	VAS
Irwin	2010	Review	N/A	Insertional	Tendinopathy	Location of pain (calcaneal tuberosity) Swelling Pain with tendon loading Stiffness	Pain on palpation Localised swelling	N/A
Jarvinen	2001	Review	N/A	Midportion	Tendinopathy	Location of pain Pain with tendon loading	Pain on palpation Localised swelling	N/A
Jayaseelan	2019	Case Report	2 (M/F = 1/1)	Midportion	Tendinopathy	Location of pain Pain with tendon loading	Pain on palpation Single-leg heel raise Hopping Restricted range of motion	VISA-A NRS Central Censitization Inventory (CSI)
Jewson	2017	Case-control	35 (M/F = 22/13)	Not specified	Tendinopathy	Location of pain Duration of symptoms (> 1 month) Pain with tendon loading	Nil	VISA-A Self-desigend questionnaire (physical activity and tendon pain characteristics)
Jowett	2018	Prospective cohort	26 (M/F = 13/13)	Midportion	Tendinopathy	Location of pain Localised swelling Duration of symptoms (> 6 months)	Pain on palpation Localised thickening	VISA-A
Jukes	2020	Review	N/A	Insertional Midportion	Tendinopathy	Location of pain Pain with tendon loading Morning stiffness Duration of symptoms	Pain on palpation Localised swelling Localised tendon thickening Royal London Hospital Test Silfverskiold test	N/A
Kader	2002	Review	N/A	Midportion	Tendinopathy	Gradual onset of pain Location of pain (2-6cm above calcaneal insertion) Duration of symptoms Morning stiffness Pain with loading	Pain on palpation Localised thickening Painful Arc Sign	N/A
Karjalainen	2000	Prospective cohort	100 (M/F = 75/25)	Insertional Midportion	Tendonosis	Location of pain Duration of pain	Pain on palpation Localised tendon thickening	Self-designed questionnaire (functional activity, pain associated activity, participation)
Khan	2003	Prospective cohort	45 (M/F = 27/18)	Insertional Midportion	Tendinopathy	Pain with tendon loading Morning stiffness VISA-A	Pain on palpation	VISA-A
Knobloch	2007	Prospective cohort	64 (M/F = 39/25)	Insertional Midportion	Tendinopathy	Location of pain (2-6cm above calcaneal insertion - midportion) Location of pain (insertion) Pain with tendon loading Swelling	Nil	Foot and Ankle Outcome Score (FAOS) VAS
Knobloch	2007	RCT	20 (M/F = 11/9)	Insertional Midportion	Tendinopathy	Location of pain (2-6cm above calcaneal insertion - midportion) Location of pain (insertion) Pain with tendon loading Swelling	Nil	VAS
Knobloch	2008	Prospective cohort	121 (M/F = 74/47)	Midportion	Tendinopathy	Location of pain (2-6cm above calcaneal insertion) Duration of symptoms (> 3 months)	Pain on palpation Localised swelling	N/A
Kragsnaes	2014	Cross-sectional Case-control	50 (M/F = 27/23)	Insertional Midportion	Tendinopathy	Location of pain Duration of pain (> 4 months)	Pain on palpation	VISA-A Self-designed questionnaire (patient characteristic, interventions and tendon pain characteristics)
Krogh	2016	RCT	24 (M/F = 13/11)	Midportion	Tendinopathy	Location of pain (2-7cm above calcaneal insertion) Pain with tendon loading	Pain on palpation Localised tendon thickening	VISA-A NRS
Lakshmanan	2004	Prospective cohort	15 (M/F = 12/3)	Midportion	Tendinopathy	Location of pain Duration of pain (> 6 months)	Not specified	Ankle Hindfoot Scale (AHS) VISA-A
Leung	2008	Case-control	71 (M/F = 31/40)	Not specified	Tendinopathy	Location of pain Duration of pain (> 6 months)	Pain on palpation Localised swelling Localised thickening	VISA-A
Lohrer	2009	Case-control	119 (M/F = not specified)	Midportion	Tendinopathy	Location of pain (2-7cm above calcaneal insertion) Pain with tendon loading	Pain on palpation	VISA-A Ankle Activity Score Percy & Conochie Score Curwin & Stanish Score
Longo	2009	Review	N/A	Midportion	Tendinopathy	Location of pain (2-6cm above calcaneal insertion) Pain with tendon loading Swelling	Pain on palpation Localised tendon thickening Painful Arc Sign Royal London Hospital Test	VISA-A
Longo	2009	Cross-sectional Cohort	178 (M/F = 110/68)	Not specified	Tendinopathy	VISA-A	Pain on palpation Localised thickening Painful Arc Sign Royal London Hospital Test	VISA-A
Maffulli	2002	Review	N/A	Midportion	Tendinopathy	Gradual onset of pain Location of pain (2-6cm above calcaneal insertion) Duration of symptoms Pain with loading	Pain on palpation Localised swelling Localised tendon thickening Painful Arc Sign	N/A
Maffulli	2003	Case-control	24 (M/F = 24/0)	Midportion	Tendinopathy	Not specified	Pain on palpation Painful Arc Sign Royal London Hospital Test	N/A
Maffulli	2004	Review	N/A	Midportion	Tendinopathy	Location of pain (2-6cm above calcaneal insertion) Pain with tendon loading	Pain on palpation Localised swelling Localised tendon thickening	N/A
Maffulli	2008	Prospective cohort	45 (M/F = 29/16)	Midportion	Tendinopathy	Location of pain (2-6cm above calcaneal insertion) Pain with tendon loading	Pain on palpation Painful Arc Sign Royal London Hospital Test	VISA-A
Maffulli	2008	Cross-sectional Cohort	50 (M/F = 50/0)	Midportion	Tendinopathy	Location of pain (2-6cm above calcaneal insertion) Duration of symptoms (> 3 months) Pain with tendon loading	Pain on palpation Localised swelling	VISA-A
Maffulli	2011	Case Report	1 (M/F = 1/0)	Midportion	Tendinopathy	Pain with tendon loading Location of pain (2-4cm above calcaneal insertion) Duration of pain (> 3 months)	Pain on palpation Painful Arc Sign Royal London Hospital Test	N/A
Maffulli	2012	Review	N/A	Midportion	Tendinopathy	Location of pain (4-6cm above calcaneal insertion) Pain with tendon loading Swelling Change in activity	Pain on palpation Localised swelling Localised thickening Reduced ROM	N/A
Maffulli	2014	Review	N/A	Midportion	Tendinopathy	Location of pain (2-6cm above calcaneal insertion) Pain with tendon loading	Pain on palpation Localised swelling Single-leg heel raise	N/A
Maffulli	2015	Review	N/A	Insertional Midportion	Tendinopathy	Location of pain (2-6cm above calcaneal insertion - midportion) Location of pain (insertion) Swelling Pain with tendon loading	Pain on palpation	N/A
Maffulli	2019	Review	N/A	Insertional	Tendinopathy	Location of pain (distal 2cm) Pain with tendon loading Stiffness	Pain on palpation Localised swelling Localised tendon thickening	VAS American Orthopaedic Foot and Ankle Society Score (AOFAS) SF-36 VISA-A
Maffulli	2020	Review	N/A	Insertional Midportion	Tendinopathy	Location of pain Painwith tendon loading Localised swelling Morning stiffness (insertional)	Pain on palpation Painful Arc Sign Royal London Hospital Test	N/A
Maffulli (dance)	2012	Review	N/A	Not specified	Tendinopathy	Gradual onset of pain Morning stiffness Pain with loading Swelling VISA-A	Pain on palpation Localised swelling Localised tendon thickening Painful Arc Sign	VISA-A
Mafi	2001	RCT	44 (M/F = 24/20)	Midportion	Tendinopathy	Location of pain (2-6cm above calcaneal insertion) Duration of symptoms (> 3 months)	Pain on palpation (2-6cm above calcaneal insertion)	VAS
Magnussen	2009	Systematic Review	677 (M/F = 347/330)	Midportion	Tendinopathy	Location of pain (2-7cm above calcaneal insertion) Pain with tendon loading	Pain on palpation Localised swelling Localised tendon thickening Pain with passive dorsiflexion Heel raise Hopping	VAS VISA-A
Mansur	2017	Protocol	N/A	Insertional	Tendinopathy	Location of pain (distal 2cm) Duration of symptoms (> 3 months)	Pain on palpation	VAS VISA-A Foot and Ankle Outcome Score (FAOS) AOFAS SF-12
Mansur	2019	Prospective cohort	19 (M/F = 11/8)	Insertional	Tendinopathy	Location of pain (distal 2cm)	Pain on palpation	VAS VISA-A AOFAS
Mantovani	2020	Cross-sectional Cohort	19 (M/F = 13/6)	Not specified	Tendinopathy	Location of pain Duration of pain (> 3 months) VISA-A (<80)	Pain on palpation	VISA-A NRS
Martin	2018	Clinical Guidelines	N/A	Midportion	Tendinopathy	Location of pain (2-6cm above calcaneal insertion) Pain with tendon loading Stiffness	Pain on palpation Painful Arc Sign Royal London Hospital Test	VISA-A Foot and Ankle Ability Measure (FAAM) LEFS
Mayer	2007	RCT	31 (M/F = 31/0)	Midportion	Tendinopathy	Location of pain Duration of symptoms (> 6months) Pain with tendon loading	Pain on palpation Localised tendon thickening	Pain Disability Index (PDI) Pain Experience Scale (PES)
McCormack	2015	Prospective cohort	15 (M/F = 4/11)	Insertional	Tendinopathy	Location of pain (distal 2cm) Duration of symptoms (> 6 weeks) Pain with tendon loading VISA-A	Pain on palpation	VISA-A LEFS
McShane	2007	Review	N/A	Midportion	Tendinopathy	Location of pain Pain with tendon loading Morning stiffness	Pain on palpation Localised tendon thickening Single-leg heel raise	N/A
Millar	2021	Review	N/A	Not specified	Tendinopathy	Location of pain Pain with tendon loading Morning stiffness	Pain on palpation Royal London Hospital Test Painful Arc Sign Single leg heel raise Hopping	N/A
Murawski	2014	Retrospective cohort	32 (M/F = 21/11)	Midportion	Tendinopathy	Location of pain (2-7cm above calcaneal insertion) Pain with tendon loading Stiffness	Pain on palpation Localised tendon thickening	Foot and Ankle Outcome Score (FAOS) SF-12 General questionnairre
Nadeau	2016	Case-control	43 (M/F = 30/13)	Midportion	Tendinopathy	Location of pain (middle third) Duration of pain (> 4 weeks) VISA-A	Pain on palpation Localised tendon thickening Pain with passive dorsiflexion Pain with resisted plantarflexion Single-leg heel raise Hopping	VISA-A
Neeter	2003	Case-control	25 (M/F = 15/10)	Midportion	Tendon pain	Location of pain (2-6cm above calcaneal insertion) Duration of symptoms (< 3 months)	Pain on palpation Single leg heel raise Range of motion (DF+PF)	self-designed questionnaire (functional activity, pain associated activity, participation)
Nichols	1989	Review	N/A	Not specified	Tendonitis Tendonosis	Gradual onset of pain Location of pain (Distal 5cm) Stiffness Pain with loading Change in activity	Pain on palpation Localised swelling Localised tendon thickening Reduced dorsiflexion Hopping	N/A
Nunes de Mesquita	2018	Case-control	67 (M/F = 41/26)	Not specified	Tendinopathy	Location of pain Duration of pain (> 2 months)	Pain on palpation	VISA-A FAOS LEFS
O'Neill	2019	Prospective cohort	16 (M/F = 11/5)	midportion	Tendinopathy	Location of pain Duration of pain (> 3 months) Pain with tendon loading	Pain on palpation Painful Arc Sign Royal London Hospital Test	VISA-A NRS
Oloff	2015	Prospective cohort	26 (M/F = not specified)	Not specified	Tendinopathy	Location of pain Duration of pain (> 6 months)	Not specified	VISA-A
Ooi	2015	Case-control	240 (M/F = 180/60)	Insertional Midportion	Tendinopathy	Location of pain Duration of pain (> 3 months)	Pain on palpation Localised swelling	VISA-A
Paavola	2002	Review	N/A	Midportion	Tendinopathy	Pain with tendon loading Duration of symptoms	Pain on palpation Localised swelling Localised tendon thickening	N/A
Paavola	2002	Prospective cohort	42 (M/F = 29/13)	Midportion	Tendinopathy	Pain with tendon loading	Pain on palpation Localised swelling Localised thickening Range of Motion Single-leg heel raise Calf circumference	N/A
Paavola	2000	Prospective cohort	107 (M/F = 78/29)	Midportion	Tendonitis	Pain with tendon loading Duration of symptoms (< 6months)	Pain on palpation Single-leg heel raise Single-leg toe raise Single-leg stance Dorsiflexion range of motion	Self-designed questionnaire (functional activity, pain associated activity, participation)
Paoloni	2004	RCT	65 (M/F =	Midportion	Tendinopathy	Location of pain Duration of pain (> 3 months) Gradual onset of pain	Pain on palpation (2-6cm above calcaneal insertion) Localised thickening Hopping	NRS Self-designed questionnaire (pain associated activity)
Papa	2012	Case Report	1 (M/F = 0/1)	Midportion	Tendinopathy	Gradual onset of pain Pain with loading	Pain on palpation Localised swelling Localised thickening Reduced dorsiflexion Heel-raise	NRS LEFS
Pedowitz	2017	Review	N/A	Insertional Midportion	Tendonitis Tendinopathy	Location of pain (2-6cm above calcaneal insertion - midportion) Location of pain (insertion) Pain with tendon loading Morning stiffness	Pain on palpation Single leg heel raise	N/A
Petersen	2007	RCT	100 (M/F = 60/40)	Midportion	Tendinopathy	Location of pain Duration of pain (> 3 months) Gradual onset of pain Pain with tendon loading	Pain on palpation (2-6cm above calcaneal insertion) Localised thickening	VAS American Orthopaedic Foot and Ankle Society Score (AOFAS) SF-36
Pingel	2013	Case-control	18 (M/F = 10/8)	Midportion	Tendinopathy	Location of pain Duration of pain (> 6 months)	Pain on palpation Localised swelling	VISA-A
Post	2020	Protocol	N/A	Insertional Midportion	Tendinopathy	Location of pain Pain with tendon loading	Walking Heel Raise Hopping	NRS TSK PCS
Praet	2018	Cross-sectional Cohort	20 (M/F = 13/7)	Midportion	Tendinopathy	Location of pain (2-6cm above calcaneal insertion) Duration of symptoms (> 2 months)	Pain on palpation	VISA-A
Rabello	2020	Case-control	46 (M/F = 30/16)	Insertional Midportion	Tendinopathy	Location of pain (2-6cm above calcaneal insertion - midportion) Location of pain (distal 2cm)	Not specified	VISA-A
Rasmussen	2008	RCT	48 (M/F = 28/20)	Not specified	Tendinopathy	Location of pain Duration of pain (> 3 months)	Pain on palpation Localised swelling Pain with dorsiflexion	VAS AOFAS
Reid	2012	Case-control	36 (M/F = not specified)	Midportion	Tendinopathy	Location of pain (2-6cm above calcaneal insertion) Pain with tendon loading	Pain on palpation	VAS VISA-A Lower Limb Task Questionnare (LLTQ)
Reiman	2014	Systematic Review	31 (M/F = 27/4)	Midportion	Tendinopathy	Location of pain (2-6cm above calcaneal insertion) Pain with tendon loading Morning stiffness	Pain on palpation Localised swelling Localised tendon thickening Painful Arc Sign Royal London Hospital Test Pain with dorsilflexion Single heel raise Hopping	N/A
Reiter	2004	Case-control	35 (M/F = 30/5)	Insertional Midportion	Tendinopathy	Location of pain Pain with tendon loading VISA-A	Pain on palpation Localised tendon thickening	VISA-A
Romero-Morales	2019	Case-control	141 (M/F = 116/25)	Midportion	Tendinopathy	Location of pain Duration of pain (> 3 months) Pain with tendon loading	Pain on palpation	VAS VISA-A
Romero-Morales (AT)	2019	Case-control	143 (M/F = not specified)	Midportion	Tendinopathy	Location of pain Duration of pain (> 3 months) Pain with tendon loading	Pain on palpation	VAS VISA-A
Rompe	2007	RCT	75 (M/F = 29/46)	Midportion	Tendinopathy	Location of pain (2-6cm above calcaneal insertion) Duration of symptoms (> 6 months) Pain with tendon loading Swelling	Not specified	NRS VISA-A
Rompe	2008	RCT	50 (M/F = 20/30)	Insertional	Tendinopathy	Location of pain Pain with tendon loading Duration of symptoms (> 6 months)	Pain on palpation Painful Arc Sign Royal London Hospital Test	NRS VISA-A
Rompe	2009	RCT	68 (M/F = 30/38)	Midportion	Tendinopathy	Location of pain (2-6cm above calcaneal insertion) Duration of symptoms (> 6 months) Pain with tendon loading Swelling	Not specified	VISA-A NRS
Roos	2004	RCT	44 (M/F = 21/23)	Midportion	Tendinopathy	Location of pain Duration of pain (> 4 weeks) Pain with tendon loading	Pain on palpation (2-6cm above calcaneal insertion)	Foot and Ankle Outcome Score (FAOS) Physical Activity Scale
Ryan	2009	Case-control	48 (M/F = 48/0)	Midportion	Tendinopathy	Location of pain (2-6cm above calcaneal insertion) Duration of symptoms (> 3 months) Pain with tendon loading	Not specified	N/A
Saini	2015	Review	N/A	Insertional Midportion	Tendinopathy	Location of pain (midportion) Location of pain (insertion) Pain with tendon loading	Pain on palpation Localised swelling Pain with dorsiflexion and plantarflexion	N/A
Santamato	2019	Cross-sectional Cohort	12 (M/F = 7/5)	Midportion	Tendinopathy	Location of pain Duration of pain (> 4 weeks)	Reduced ROM Pain during AROM Painful Arc Sign Royal London Hospital Test	VAS VISA-A
Sayana	2007	Prospective cohort	34 (M/F = 18/16)	Midportion	Tendinopathy	Location of pain (2-6cm above calcaneal insertion) Pain with tendon loading	Pain on palpation Painful Arc Sign Royal London Hospital Test	VISA-A
Scholes	2018	Cross-sectional Cohort	21 (M/F = 21/0)	Midportion	Tendinopathy	Location of pain (midportion) Duration of pain (> 12 weeks) Pain with tendon loading Morning stiffness	Not specified	VISA-A
Scott	2011	Review	N/A	MIdportion	Tendonosis Tendinopathy	Location of pain Pain with tendon loading Swelling	Pain on palpation Localised tendon thickening	VAS VISA-A Pain disability index Pain Experience scale FAOS
Senkerij	2009	Case-control	25 (M/F = 16/9)	Midportion	Tendinopathy	Location of pain (2-7cm above calcaneal insertion) Pain with tendon loading	Pain on palpation	VISA-A
Sharma	2006	Review	N/A	Midportion	Tendinopathy	Location of pain (2-6cm above calcaneal insertion) Pain with tendon loading Swelling	Pain on palpation Localised swelling Localised tendon thickening	N/A
Silbernagel	2007	Prospective cohort	37 (M/F = 20/17)	Midportion	Tendinopathy	Location of pain Duration of pain (> 2 months) Pain with tendon loading Swelling	Counter movement Jump Hopping Heel raise	VISA-A
Silbernagel	2001	RCT	49 (M/F = 36/13)	Not specified	Tendon pain	Location of pain Duration of pain (> 3 months)	Pain on palpation Single leg heel raise Hopping Range of motion (DF+PF)	Self-designed questionnaire (functional activity, pain associated activity, participation) VAS
Simpson	2009	Review	N/A	Midportion	Tendinopathy	Location of pain (2-5cm above calcaneal insertion) Pain on loading Swelling Change in activity	Pain on palpation Localised swelling Reduced flexibility in hamstring and calf	N/A
Solomons	2020	RCT	52 (M/F = 24/28)	Midportion	Tendinopathy	Location of pain Duration of pain (> 3 months) Pain with tendon loading	Double leg heel raise Single leg heel raise Jump Hopping (height + distance)	VISA-A Global rating of change (GROC)
Sorosky	2004	Review	N/A	Not specified	Tendinopathy	Gradual onset of pain Pain with loading Change in training	Pain on palpation Localised swelling Localised tendon thickening Pain with passive dorsiflexion Pain with resisted plantarflexion	N/A
Stenson	2018	Retrospective cohort	664 (M/F = 312/352)	Insertional	Tendinopathy	Location of pain (insertion) Duration of pain (> 3 months)	Range of motion	VAS Foot and Ankle Mobility Measure (FAAM) SF-12
Stergioulas	2008	RCT	40 (M/F = 25/15)	Midportion	Tendinopathy	Location of pain Duration of pain (> 6 months) Pain with tendon loading	Pain on palpation (2-6cm above calcaneal insertion) Reduced active dorsiflexion (10deg)	VAS
Syvertson	2017	Prospective cohort	11 (M/F = 4/7)	Midportion	Tendinopathy	Location of pain (2-6cm above calcaneal insertion) Pain with tendon loading Morning stiffness	Pain on palpation	NRS VISA-A Disablement in the Physical Active (DPA Scale) Global Rating of Change Scale (GRC) Nirschl Phase Rating Scale (NPRS)
Tan	2008	Review	N/A	Midportion	Tendinopathy	Location of pain (midportion) Duration of pain (> 2 weeks) Pain with tendon loading Morning stiffness	Pain on palpation Localised swelling Localised tendon thickening Single-leg heel raise	VISA-A
Thomas	2010	Clinical Guidelines	N/A	Insertional	Tendinopathy	Location of pain Pain with tendon loading Swelling	Pain on palpation Localised tendon thickening	N/A
Turner	2020	Cross-sectional Cohort	15 (M/F = 8/7)	Insertional Midportion	Tendinopathy	Location of pain Duration of pain (> 3 months) Gradual onset of pain Pain with tendon loading	Not specified	VAS VISA-A
Vallance	2020	Cross-sectional Cohort	86 (M/F = 86/0)	Insertional Midportion	Tendinopathy	Location of pain Duration of pain (> 3 months) Pain with tendon loading Stiffness	Single-leg heel raise Hopping	NRS VISA-A TSK PCS
Van Der Vlist	2020	RCT	91 (M/F = 45/46)	Midportion	Tendinopathy	Location of pain Duration of pain (> 2 months) Pain with tendon loading	Pain on palpation (2-7cm above calcaneal insertion) Localised swelling	VAS VISA-A
Van Der Vlist	2020	Cross-sectional Cohort	28 (M/F = 16/12)	Midportion	Tendinopathy	Location of pain Duration of pain (> 2 months) Pain with tendon loading	Pain on palpation (2-7cm above calcaneal insertion) Localised swelling	VISA-A
Van Sterkenburg	2011	Case report	3 (M/F = 1/2)	Midportion	Tendinopathy	Location of pain (4-7cm above calcaneal insertion) Stiffness	Pain on palpation Localised thickening	VAS VISA-A
Verrall	2011	Case-control	190 (M/F = 108/82)	Insertional Midportion	Tendinopathy	Location of pain (2-6cm above calcaneal insertion - midportion) Location of pain (distal 2cm) Duration of pain (> 12 weeks) Pain with tendon loading Morning stiffness	Pain on palpation Localised swelling	VAS
Von Wehren	2019	Retrospective cohort	50 (M/F = 27/23)	Midportion	Tendinopathy	Location of pain Duration of pain (> 6 weeks) Pain limited function	Pain on palpation Localised swelling	VISA-A
Wang	2012	Cross-sectional Cohort	17 (M/F = 17/0)	Midportion	Tendonosis Tendinopathy	Location of pain (2-6cm above calcaneal insertion) Duration of pain (> 3 months) Pain with tendon loading VISA-A	Pain on palpation Royal London Hospital Test	VISA-A
Wei	2017	Retrospective cohort	68 (M/F = 53/15)	Insertional	Tendonosis	Location of pain Duration of pain (> 6 months) Pain with tendon loading	Pain on palpation	VAS VISA-A AOFAS
Welsh	1980	Retrospective cohort	50 (M/F = 28/22)	Insertional Midportion	Tendonitis	Location of pain Pain with tendon loading	Pain on palpation (2-4cm above calcaneal insertion)	N/A
Xu	2019	Consensus Statement	N/A	Insertional	Tendinopathy	Location of pain (insertion) Pain with tendon loading	Pain on palpation Localised swelling Pain with active dorsiflexion (insertional) Silverskiold Test	N/A
Zellers	2019	Retrospective cohort	56 (M/F = 25/31)	Insertional	Tendinopathy	Location of pain (insertion)	Pain on palpation	VISA-A 6-point Physical Activity Scale (PAS)
Zhang	2017	Case-control	37 (M/F = 26/11)	Insertional Midportion	Tendinopathy	Location of pain (2-6cm above calcaneal insertion - midportion) Location of pain (insertion)	Pain on palpation Pain with resisted plantarflexion	N/A
Zhang	2020	Retrospective cohort	33 (M/F =	Insertional	Tendinopathy	Location of pain (insertion) Duration of pain (> 3 months)	Not specified	VAS VISA-A
Zhuang	2019	Prospective cohort	28 (M/F = 17/11)	Insertional	Tendinopathy	Location of pain (insertion)	Pain on palpation Localised tendon thickening Pain with resisted plantarflexion Reduced plantarflexion strength Heel raise test	VAS American Orthopaedic Foot and Ankle Society Score (AOFAS) Manchester-Oxford Foot Questionnaire (MOXFQ)
